# Supplementary material for: Mec1-independent activation of the Rad53 checkpoint kinase revealed by quantitative analysis of protein localization dynamics
Source: eLife. 2023 Jun 6;12:e82483. doi: 10.7554/eLife.82483 (PMC10259420; doi:10.7554/eLife.82483)
Supplement: Supplementary file 6. [file elife-82483-supp6.xlsx]

## Sheet: Sheet1
Supplementary File 6. Changes in Rad53 phosphorylation sites identified by SILAC mass spectrometry.
Protein	Phosphorylation Site	Phospho-Peptide	Median (RAD53-FLAG mec1Δsml1Δ/ RAD53-FLAG mec1Δsml1Δrtg3Δ; log2)	Standard Deviation	Spectral Counts
YPL153C	YPL153C_24	R.FLIEKFSphosQEQIGENIVCR.V	-4.6374	0.827262	2
YPL153C	YPL153C_789	R.IHSphosVSLSQSQIDPSK.K	-0.487006	0.23406	2
YPL153C	YPL153C_560	K.LLHSphosNNTENVK.S	-0.441007		1
YPL153C	YPL153C_789 791	R.IHSphosVSphosLSQSQIDPSK.K	-0.352002	0.810866	3
YPL153C	YPL153C_547	K.SphosIEAETR.E	-0.0524422	0.0476096	3
YPL153C	YPL153C_372 373_C	R.GKD(TS)phosVSPDEYEER.N	0.428685		1
YPL153C	YPL153C_795	R.IHSVSLSQSphosQIDPSKK.V	1.00405		1
YPL153C	YPL153C_175	K.IASphosPGLTSSTASSMVANK.T	1.11078	0.0236543	6
YPL153C	YPL153C_791	R.IHSVSphosLSQSQIDPSK.K	1.30511		1
YPL153C	YPL153C_793	R.IHSVSLSphosQSQIDPSK.K	1.39053	0.255394	4
YPL153C	YPL153C_757	K.KPPVSphosDTNNNGNNSVLNDLVESPINANTGNILK.R	1.93624		1
YPL153C	YPL153C_489	K.MSPLGSQSYGDFSQISLSQSLSphosQQK.L	2.16457		1
YPL153C	YPL153C_745 746 747 748_C	R.ANQPSA(SSSS)phosMSAK.K	2.21122		1
YPL153C	YPL153C_774	K.KPPVSDTNNNGNNSVLNDLVESphosPINANTGNILK.R	2.648	1.02628	11
YPL153C	YPL153C_480	K.MSPLGSQSYGDFSphosQISLSQSLSQQK.L	3.14177		1
YPL153C	YPL153C_469	K.MSphosPLGSQSYGDFSQISLSQSLSQQK.L	3.41017		1
YPL153C	YPL153C_473	K.MSPLGSphosQSYGDFSQISLSQSLSQQK.L	3.636		1
YPL153C	YPL153C_766	K.KPPVSDTNNNGNNSphosVLNDLVESPINANTGNILK.R	3.83122	0.412169	3
